# Supplementary material for: Comparing Essentiality of SOS1-Mediated Na+ Exclusion in Salinity Tolerance between Cultivated and Wild Rice Species
Source: MDPI journal article supplement (doi:10.3390/ijms23179900), 2022-08-31
Supplement: s1 [file s1]

**Suppl Figure S1.** Relative shoot fresh (FW) and dry (DW) weight (% control) of rice cultivars and species used in this study after being grown in the presence of 100 mM NaCl for 3 weeks (see Shahzad et al. 2022 Functional Plant Biology for details).

| Species    | Genotype           | Tolerance | Shoot FW    | Shoot DW    |
|------------|--------------------|-----------|-------------|-------------|
| Cultivated | IR1                | Tolerant  | 75.4 ± 2.4a | 74.1 ± 2.3a |
| Cultivated | IR29               | Sensitive | 40.1 ± 1.6c | 36.1 ± 1.5c |
| Wild       | <i>O. alta</i>     | Tolerant  | 62.1 ± 2.9b | 69.4 ± 2.5a |
| Wild       | <i>O. punctata</i> | Sensitive | 45.1 ± 2.2c | 45.5 ± 1.8b |
